# Supplementary material for: Thioxanthone based one-component polymerizable visible light photoinitiator for free radical polymerization
Source: Royal Society of Chemistry journal article supplement (doi:10.1039/c6ra15349f), 2016-01-01
Supplement: c6ra15349f1.pdf [file c6ra15349f1.pdf]

## Supporting Information

### Thioxanthone based one-component polymerizable visible light photoinitiator for free radical polymerization

Qingqing Wu, Xiaoling Wang, Ying Xiong\*, Jianjing Yang and Hongding

Tang\*

College of Chemistry and Molecular Sciences, Wuhan University, Wuhan,

430072, P. R. China

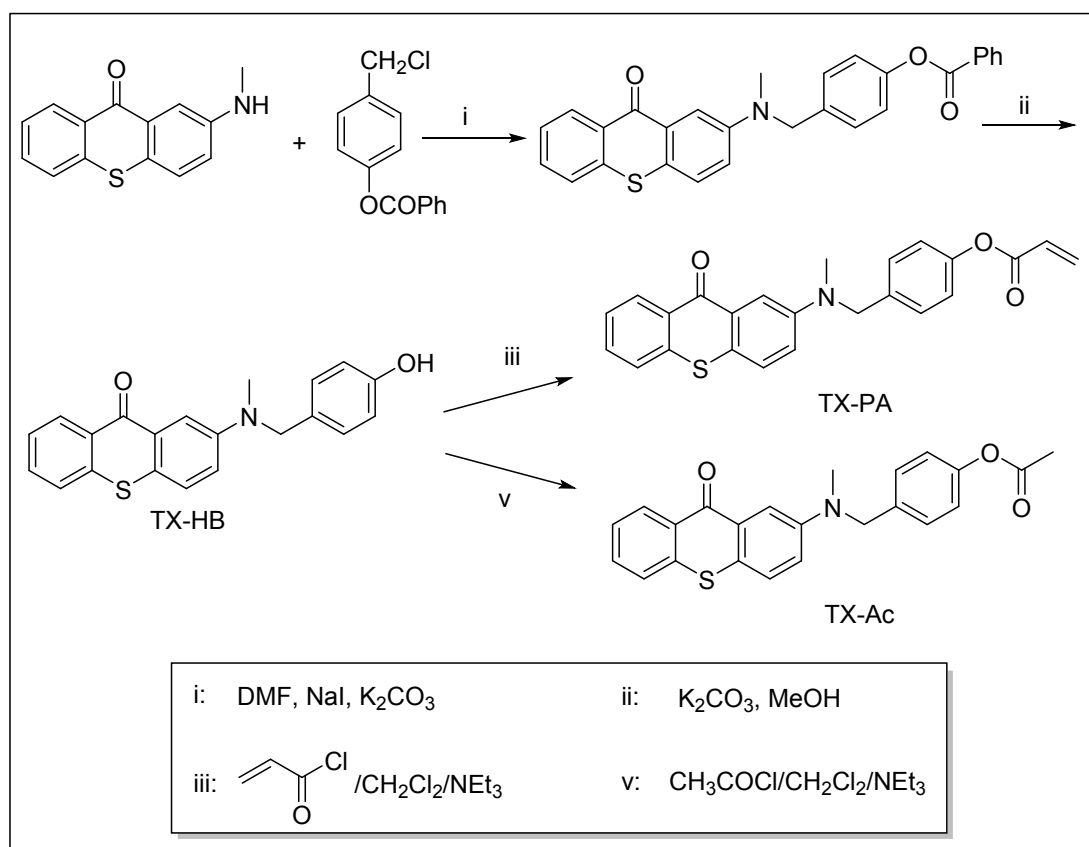

**Scheme S1** Synthesis of TX-PA and TX-Ac

## Experimental section

### Materials and instrumentation

2-Benzyl(methyl)amino-9H-thioxanthen-9-one (TX-B), <sup>1</sup> 2-methylamino-9H-thioxanthen-9-one<sup>1</sup> and 4-(hydroxymethyl)phenyl benzoate<sup>2</sup> were prepared following the literature methods. *N,N*-Dimethylformamide (DMF) and methylene chloride (CH<sub>2</sub>Cl<sub>2</sub>) were dried and purified according to the standard laboratory methods. 1,6-hexanedioldiacrylate (HDDA, 90%) was obtained from Aladdin. All reagents and solvents were also obtained from Aladdin and used as received without further purification. <sup>1</sup>H (300 MHz) and <sup>13</sup>C (75 MHz) NMR spectra were determined at room temperature on a VARIAN Mercury 300 spectrometer of the Spectropole. Mass spectrometry was carried out using a Varian 320-MS triple quadrupole mass spectrometer operated in the electrospray ionization (ESI) modes.

### Synthesis of 4-(chloromethyl)phenyl benzoate

Thionyl chloride (7.25 mL) was added dropwisely to the solution of 4-(hydroxymethyl)phenyl benzoate (11.40 g, 50 mmol) in anhydrous CH<sub>2</sub>Cl<sub>2</sub> (100 mL). Then, the solution was stirred for an additional hour at room temperature and the substances with low boiling point were removed under reduced pressure. Two milliliter of CH<sub>2</sub>Cl<sub>2</sub> was added into the residue. The solution was poured into 50 mL of petroleum ether. The precipitate was filtered off and dried under vacuum to give a white powder (11.07 g, 90%). <sup>1</sup>H NMR (CDCl<sub>3</sub>, 300 MHz) δ ppm: 4.62 (s, 2H, -CH<sub>2</sub>), 7.19-7.25 (m, 2H, Ar-H), 7.40-7.55 (m, 4H, Ar-H), 7.61-7.68 (m, 1H, Ar-H),

8.20 (d, 2H, Ar-H, J = 7.2 Hz). <sup>13</sup>C NMR (CDCl<sub>3</sub>, 75 MHz) δ ppm: 165.0 (C=O), 150.8 (ArC), 135.0 (ArC), 133.7 (ArCH), 130.2 (ArC), 129.8 (ArCH), 129.3 (ArCH), 128.6 (ArCH), 122.0 (ArCH), 45.6 (-CH<sub>2</sub>).

**Synthesis of 4-((methyl(9-oxo-9H-thioxanthen-2-yl)amino)methyl)phenyl benzoate**

A mixture of 2-methylamino-9H-thioxanthen-9-one (7.32 g, 30.0 mmol), sodium iodide (0.15g, 1.0 mmol), 4-(chloromethyl)phenyl benzoate (7.75 g, 31.5 mmol), K<sub>2</sub>CO<sub>3</sub> (8.28 g, 60.0 mmol) and 100 mL of anhydrous DMF was stirred at 50 °C until the absence of 2-methylamino-9H-thioxanthen-9-one which was monitored by TLC. And then, the mixture was cooled down and the yellow precipitate was collected by filtration. The solid was dissolved in 20 mL of CH<sub>2</sub>Cl<sub>2</sub>, and then the solution was added into 200 mL of petroleum ether which afforded a yellow precipitate. The solid was collected by filtration and dried under high vacuum to give a yellow powder (12.45 g, 92%). <sup>1</sup>H NMR (CDCl<sub>3</sub>, 300 MHz) δ ppm: 3.18 (s, 3H, -NCH<sub>3</sub>), 4.67 (s, 2H, -NCH<sub>2</sub>), 7.18 (d, 3H, Ar-H, J = 7.8 Hz), 7.31 (d, 2H, Ar-H, J = 8.1 Hz), 7.46 (d, 2H, Ar-H, J = 4.2 Hz), 7.51 (t, 2H, Ar-H, J = 8.1 Hz), 7.56-7.65 (m, 3H, Ar-H), 8.00 (d, 1H, Ar-H, J = 2.4 Hz), 8.19 (d, 2H, Ar-H, J = 8.4 Hz), 8.63 (d, 1H, Ar-H, J = 8.1 Hz). <sup>13</sup>C NMR (CDCl<sub>3</sub>, 75 MHz) δ ppm: 180.0 (C=O), 165.2 (COO), 149.9 (ArC), 148.1 (ArC), 137.7 (ArC), 135.7 (ArC), 133.6 (ArCH), 131.6 (ArCH), 130.1 (ArCH), 129.8 (ArC), 129.4 (ArCH), 128.5 (ArC), 127.7 (ArCH), 126.9 (ArC), 125.9 (ArCH), 125.6 (ArCH), 124.3 (ArCH), 121.9 (ArCH), 118.8 (ArCH), 110.4 (ArCH), 55.9

(CH<sub>2</sub>), 38.8 (CH<sub>3</sub>).

### **Synthesis of 2-[(4-hydroxybenzyl)(methyl)amino]-9H-thioxanthen-9-one (TX-HB)**

A mixture of 4-((methyl(9-oxo-9H-thioxanthen-2-yl)amino)methyl)phenyl benzoate (13.53 g, 30.0 mmol), 100 mL of methanol, and 0.10 g anhydrous K<sub>2</sub>CO<sub>3</sub> was stirred under reflux conditions for 2 h. Then it was cooled down to room temperature and then was filtered to remove solids. After the methanol was stripped off under a reduced pressure, 5 mL of THF was added to the residue. Then the solution was added into 200 mL of petroleum ether which afforded a red precipitate. The solid was collected by filtration and dried under high vacuum to give a red powder (7.33 g, 70%), m.p. 182-184 °C. <sup>1</sup>H NMR (DMSO-d<sub>6</sub>, 300 MHz) δ ppm: 3.05 (s, 3H, -NCH<sub>3</sub>), 4.52 (s, 2H, -NCH<sub>2</sub>), 6.72 (d, 2H, Ar-H, J = 8.1 Hz), 7.03 (d, 2H, Ar-H, J = 8.1 Hz), 7.24-7.27 (m, 1H, Ar-H), 7.45-7.54 (m, 2H, Ar-H), 7.64-7.71 (m, 3H, Ar-H), 8.42 (d, 1H, Ar-H, J = 7.5 Hz), 9.33 (s, 1H, -OH). <sup>13</sup>C NMR (DMSO-d<sub>6</sub>, 75 MHz) δ ppm: 184.1 (C=O), 161.8 (ArC), 153.3 (ArC), 142.4 (ArC), 137.6 (ArCH), 134.5 (ArCH), 133.6 (ArC), 133.4 (ArC), 133.3 (ArCH), 132.6 (ArC), 131.8 (ArCH), 131.4 (ArC), 128.1 (ArCH), 124.7 (ArCH), 120.8 (ArCH), 114.6 (ArCH), 60.2 (-NCH<sub>2</sub>), 43.9 (-NCH<sub>3</sub>). MS, m/z (ESI) 348.1 ([M+H]<sup>+</sup>, 100%).

### **Synthesis of 4-((methyl(9-oxo-9H-thioxanthen-2-yl)amino)methyl)phenyl acrylate (TX-PA)**

TX-HB (0.69 g, 2.0 mmol), triethylamine (0.28 mL, 4.0 mmol), and 50 mL of CH<sub>2</sub>Cl<sub>2</sub>

were added into a 250 mL of three-necked round bottom flask fitted with a thermometer and a pressure-equalized funnel. Under cooling (0-5 °C), the solution of acryloyl chloride (0.34 mL, 4.0 mmol) and 10 mL of CH<sub>2</sub>Cl<sub>2</sub> was added dropwise into the flask within 1 h. The mixture was stirred at room temperature for another hour. Then, the low-boiling point substances were stripped off under vacuum. After that, 50 mL of CH<sub>2</sub>Cl<sub>2</sub> was added. The mixture was washed with water, and dried overnight with anhydrous sodium sulfate. After evaporated the low-boiling point substances, additional 2 mL of CH<sub>2</sub>Cl<sub>2</sub> was added and the mixture was dropped into 50 mL of petroleum ether. After the precipitates were filtered off and dried under vacuum, 0.64 g of yellow product was collected with 80% yield, m.p. 102-104 °C. <sup>1</sup>H NMR (CDCl<sub>3</sub>, 300 MHz) δ ppm: 3.16 (s, 3H, -NCH<sub>3</sub>), 4.65 (s, 2H, -NCH<sub>2</sub>), 6.00-6.05 (m, 1H, -CH=CH<sub>2</sub>), 6.27-6.42 (m, 1H, -CH=CH<sub>2</sub>), 6.58-6.64 (m, 1H, -CH=CH<sub>2</sub>), 7.09-7.15 (m, 3H, Ar-H), 7.26-7.29 (m, 2H, Ar-H), 7.41-7.48 (m, 2H, Ar-H), 7.57-7.59 (m, 2H, Ar-H), 7.97 (d, 1H, Ar-H, J = 2.7 Hz), 8.64 (d, 1H, Ar-H, J = 8.1 Hz). <sup>13</sup>C NMR (CDCl<sub>3</sub>, 75 MHz) δ ppm: 179.9 (C=O), 164.5 (OC=O), 149.6 (ArC), 148.1 (ArC), 137.7 (ArC), 135.7 (ArC), 132.5 (-CH=CH<sub>2</sub>), 131.6 (ArCH), 129.8 (ArCH), 128.7 (ArCH), 127.8 (ArC), 127.6 (-CH=CH<sub>2</sub>), 126.9 (ArC), 125.9 (ArCH), 125.5 (ArC), 124.3 (ArCH), 121.7 (ArCH), 118.8 (ArCH), 110.5 (ArCH), 55.8 (-NCH<sub>2</sub>), 38.7 (-NCH<sub>3</sub>). MS, m/z (ESI) 402.0 ([M+H]<sup>+</sup>, 100%).

**Synthesis of 4-((methyl(9-oxo-9H-thioxanthen-2-yl)amino)methyl)phenyl acetate (TX-Ac)**

Following the method of 4-((methyl(9-oxo-9H-thioxanthen-2-yl)amino)methyl)phenyl acrylate was synthesized.  $^1\text{H}$  NMR ( $\text{CDCl}_3$ , 300 MHz)  $\delta$  ppm: 2.29 (s, 3H,  $-\text{COCH}_3$ ), 3.15 (s, 3H,  $-\text{NCH}_3$ ), 4.64 (s, 2H,  $-\text{CH}_2$ ), 7.04 (d, 2H, Ar-H,  $J = 7.8$  Hz), 7.11 (d, 1H, Ar-H,  $J = 7.8$  Hz), 7.24 (m, 1H, Ar-H), 7.43 (d, 2H, Ar-H,  $J = 8.1$  Hz), 7.57 (s, 2H, Ar-H), 7.95 (s, 1H, Ar-H), 8.62 (d, 1H, Ar-H,  $J = 8.1$  Hz).  $^{13}\text{C}$  NMR ( $\text{CDCl}_3$ , 75 MHz)  $\delta$  ppm: 179.8 (C=O), 169.4 (OC=O), 149.5 (ArC), 148.0 (ArC), 137.6 (ArC), 135.6 (ArC), 131.5 (ArCH), 129.6 (ArCH), 128.5 (ArCH), 127.5 (ArC), 126.8 (ArC), 125.8 (ArCH), 125.4 (ArCH), 124.2 (ArCH), 121.7 (ArCH), 118.6 (ArCH), 110.2 (ArCH), 55.7 ( $-\text{NCH}_2$ ), 38.6 ( $-\text{NCH}_3$ ), 21.0 ( $-\text{CH}_3$ ). MS,  $m/z$  (ESI) 390.0 ( $[\text{M}+\text{H}]^+$ , 100%).

# $^1\text{H}$ (300 MHz) / $^{13}\text{C}$ (75 MHz) NMR Spectra

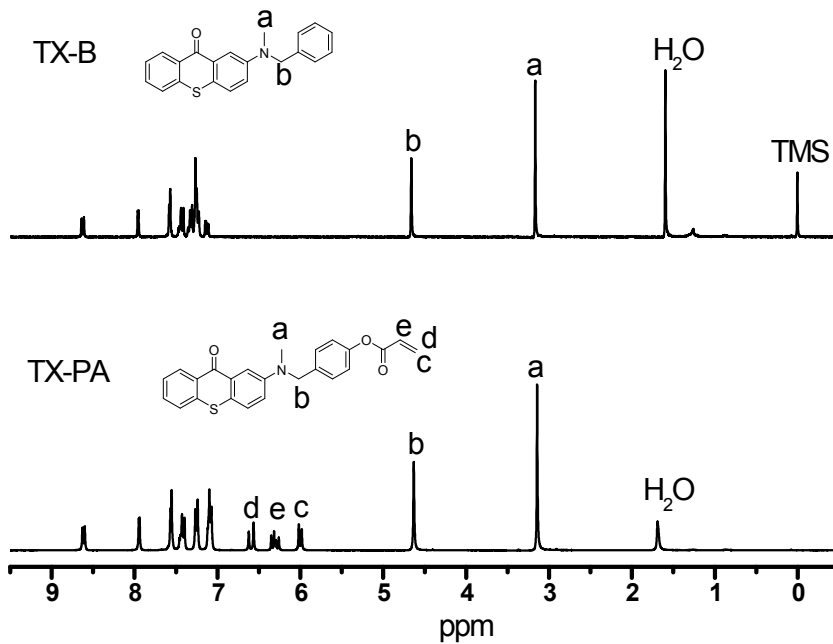

Fig. S1  $^1\text{H}$  NMR spectrum of TX-B and TX-PA in  $\text{CDCl}_3$ .

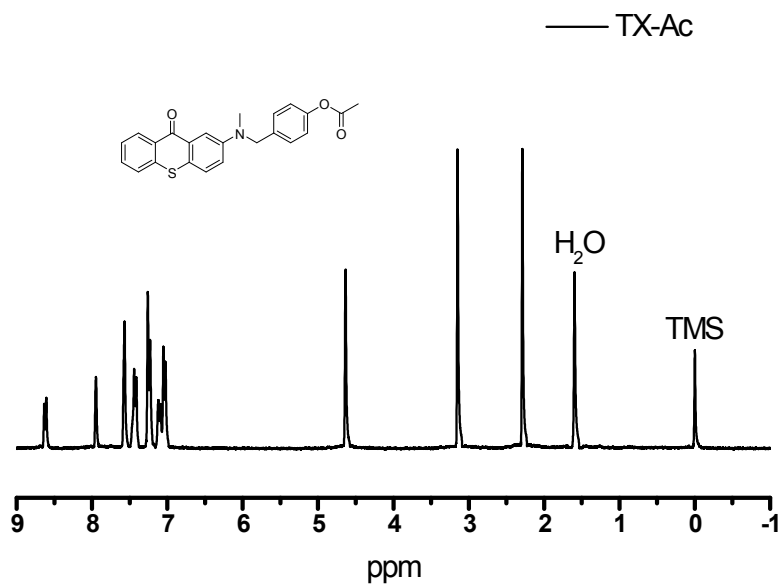

Fig. S2  $^1\text{H}$  NMR spectrum of TX-Ac in  $\text{CDCl}_3$ .

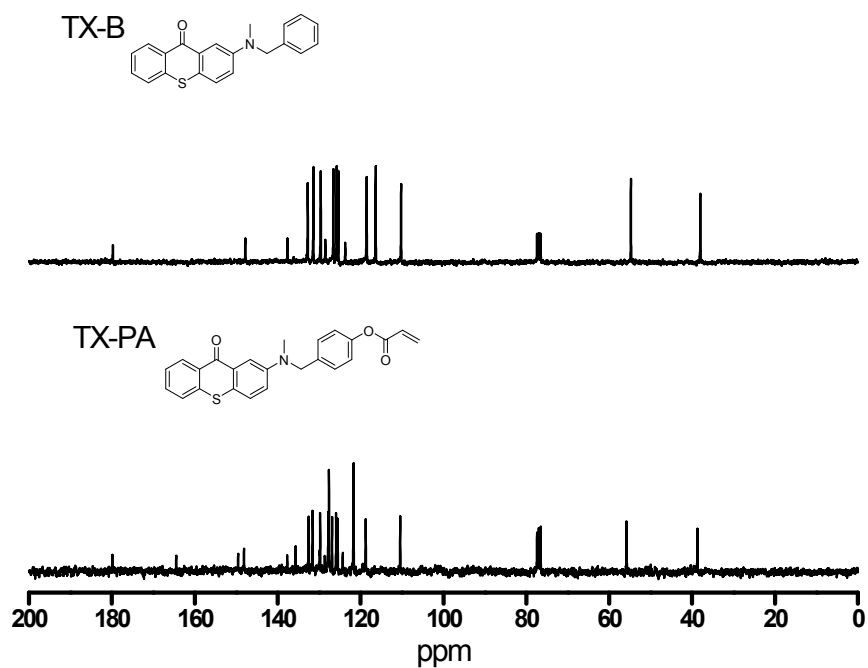

Fig. S3  $^{13}\text{C}$  NMR of TX-B and TX-PA in  $\text{CDCl}_3$ .

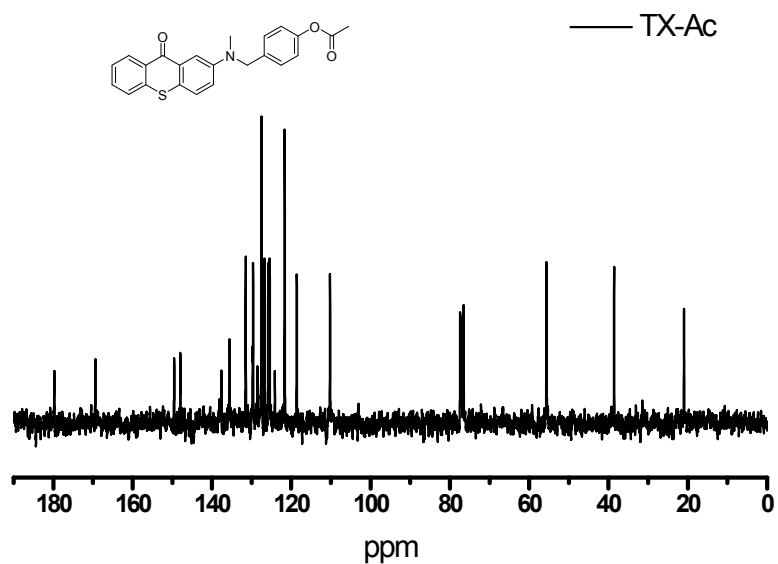

Fig. S4  $^{13}\text{C}$  NMR of TX-Ac in  $\text{CDCl}_3$ .



# ESI-MS Analysis

GCMS-2015-N018 #204-206 RT: 5.47-5.54 AV: 3 NL: 1.30E5  
T: + c ESI Full ms [50.00-2000.00]

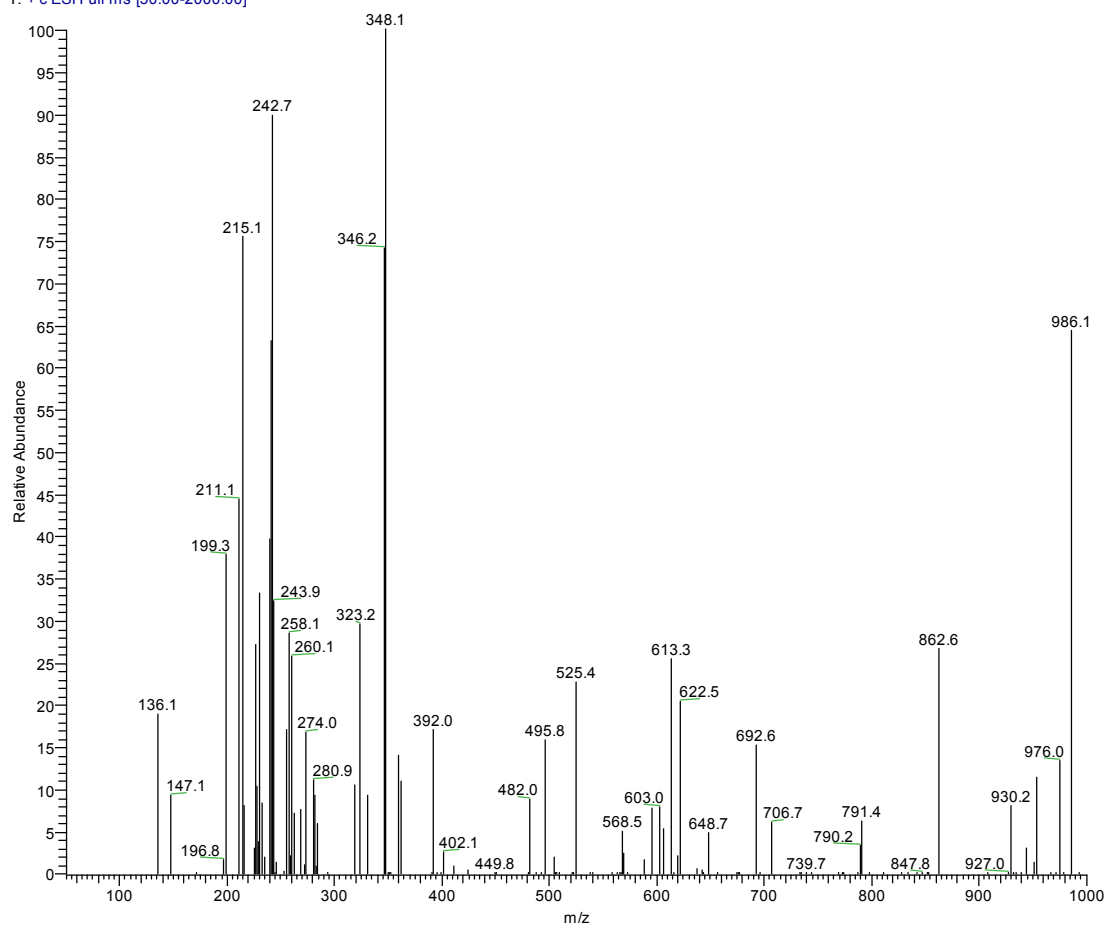

Fig. S5 Mass spectrometry of TX-HB.

ESI-2015-N095 #4 RT: 0.10 AV: 1 NL: 3.75E4  
T: + c ESI Full ms [50.00-2000.00]

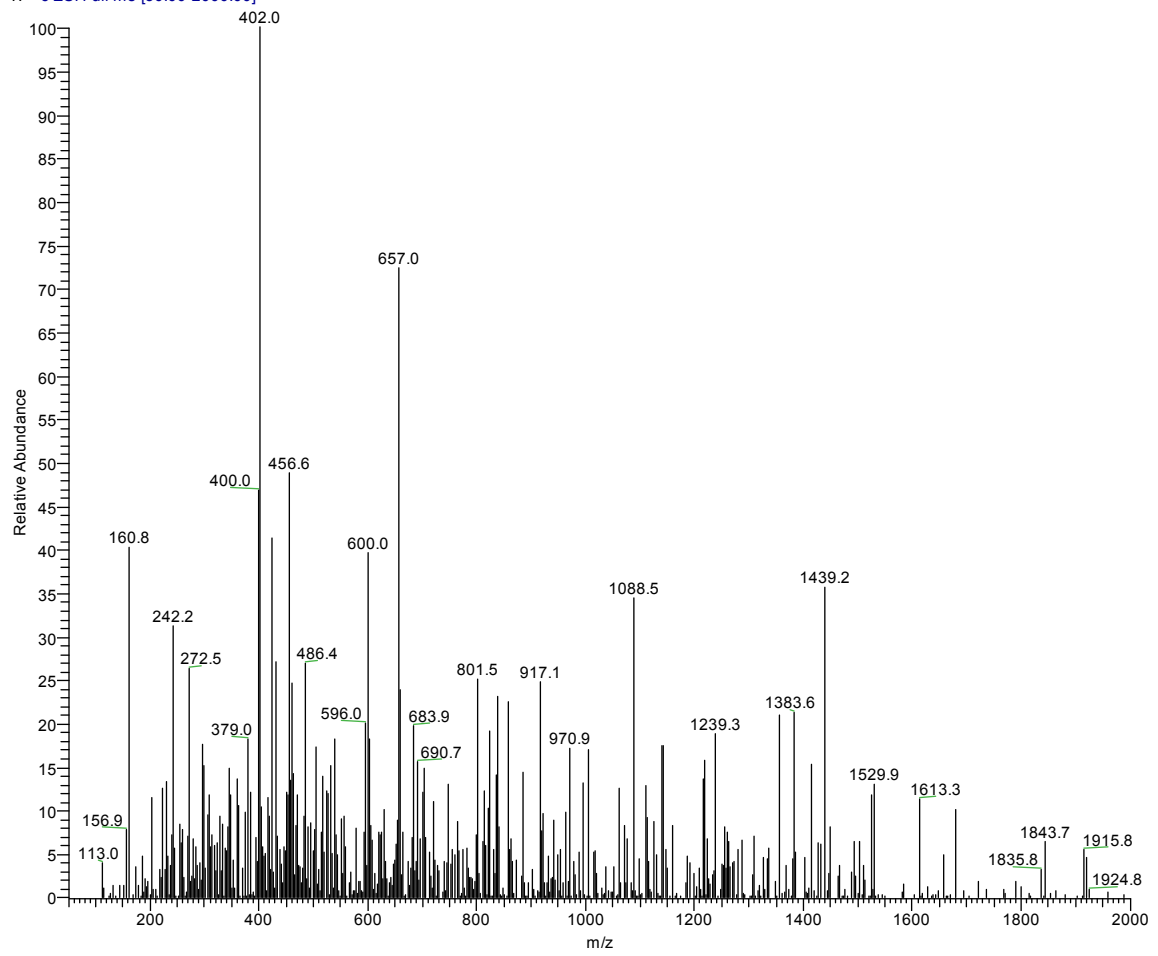

Fig. S6 Mass spectrometry of TX-PA.

ESI-2016-N035-TX-AC #3 RT: 0.06 AV: 1 NL: 1.24E7  
T: + c ESI Full ms [50.00-2000.00]

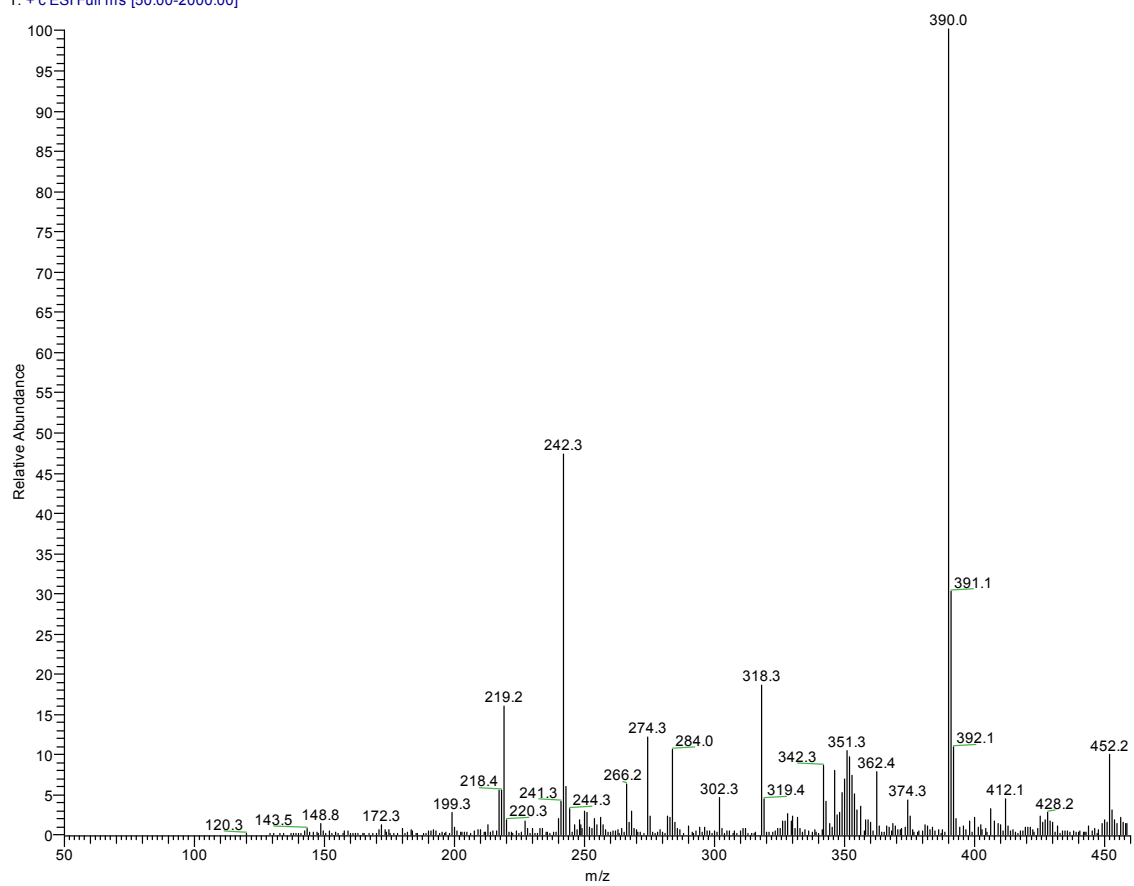

**Fig. S7** Mass spectrometry of TX-Ac.

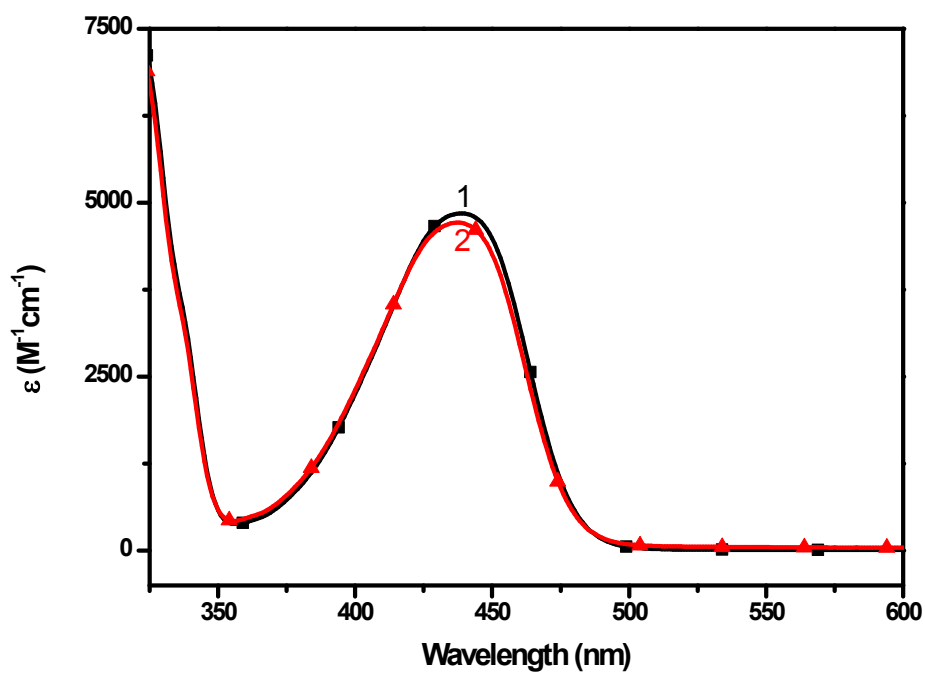

**Fig. S8** UV-vis absorption spectra of (1) TX-B and (2) TX-PA in THF solution [ $2 \times 10^{-4}$  mol L<sup>-1</sup>].

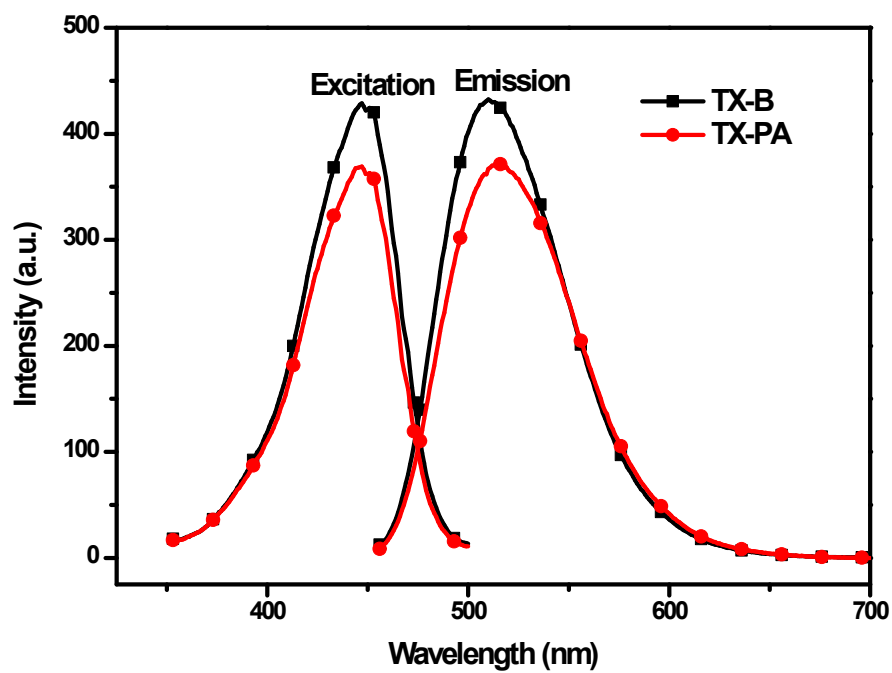

**Fig. S9** Fluorescence excitation and emission spectra of TX-B and TX-PA in THF solution [ $8 \times 10^{-6}$  mol L<sup>-1</sup>].

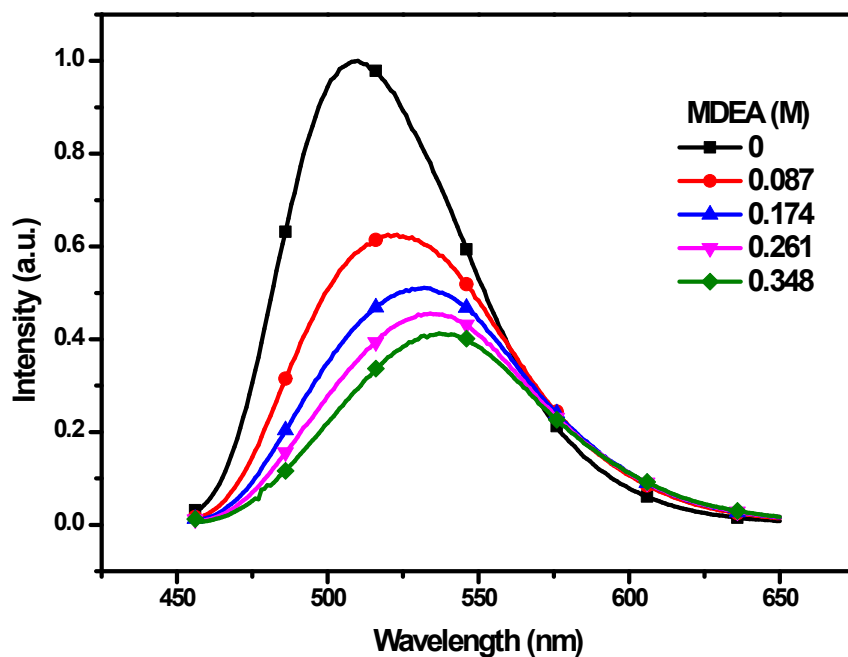

**Fig. S10** The fluorescence emission of TX-PA in THF solution [ $8 \times 10^{-6}$  mol L<sup>-1</sup>] with different concentration of MDEA.

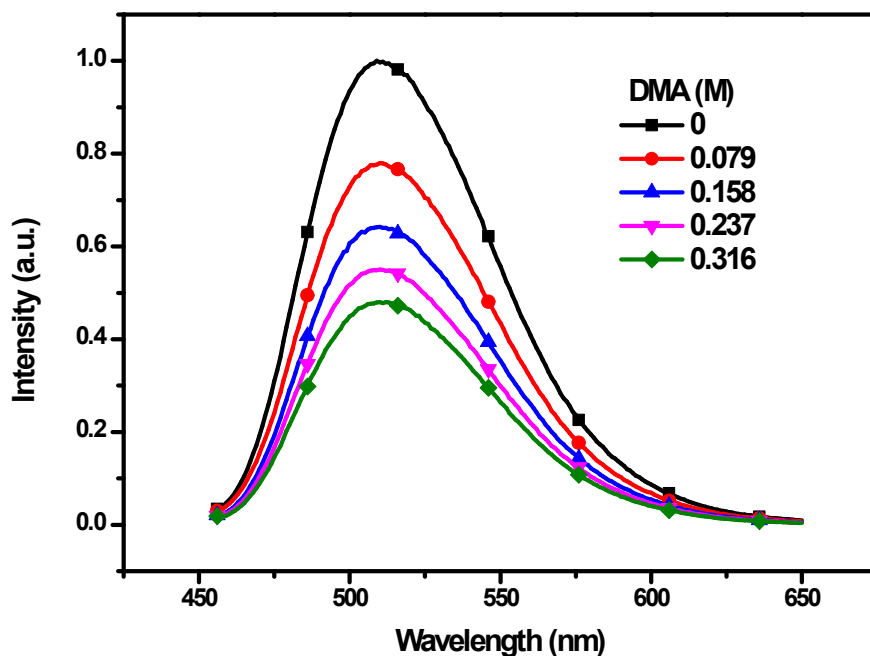

**Fig. S11** The fluorescence emission of TX-PA in THF solution [ $8 \times 10^{-6}$  mol L<sup>-1</sup>] with different concentration of DMA.

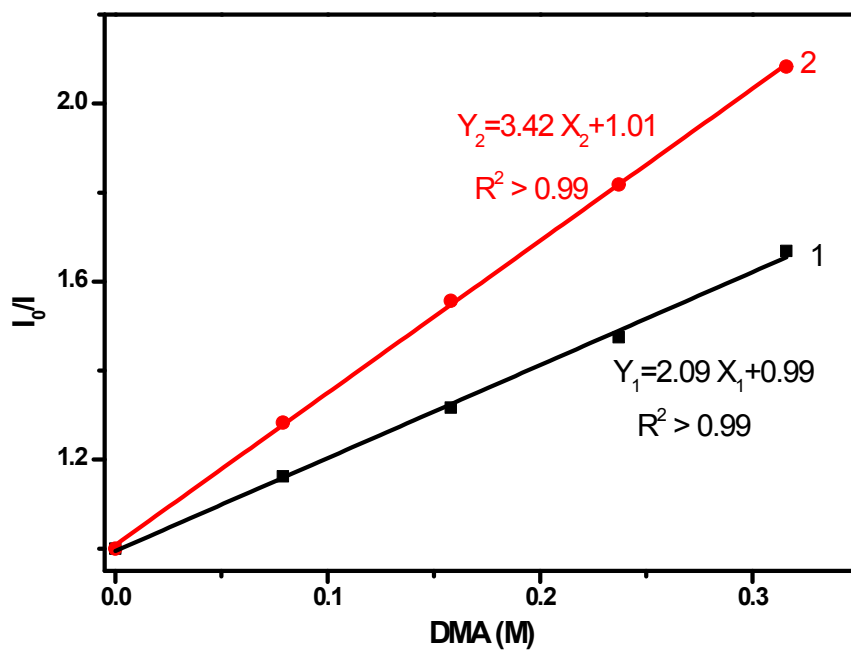

**Fig. S12** Stern-Volmer plot of the quenching of (1) TX-B and (2) TX-PA [ $8 \times 10^{-6}$  mol L $^{-1}$ ] by DMA in THF.

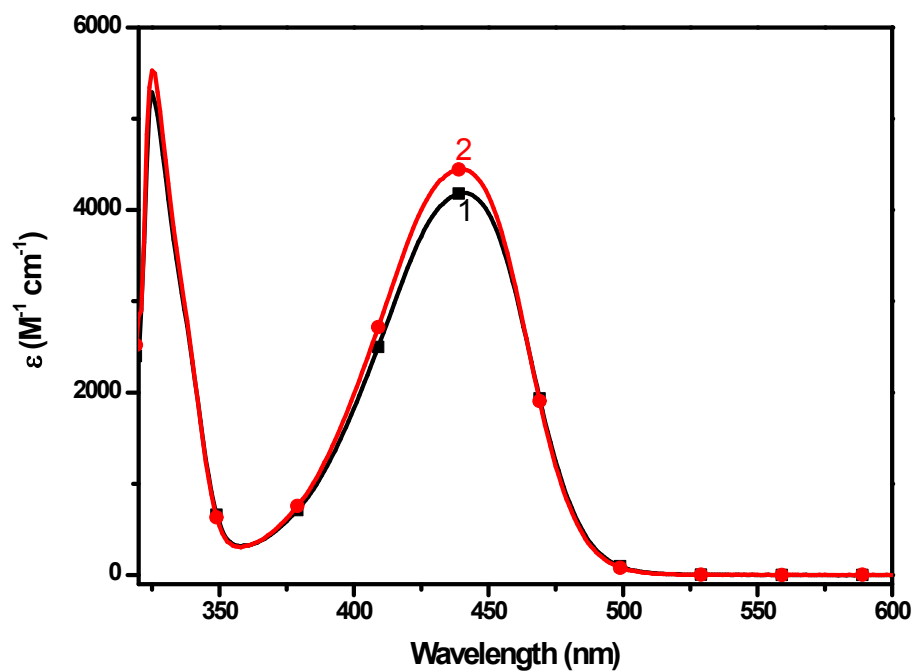

**Fig. S13** UV-vis absorption spectra of (1) TX-B and (2) TX-PA in acetone solution.

## Notes and references

---

1 Q. Wu, Y. Xiong, Q. Liang and H. Tang, *RSC Adv.*, 2014, **4**, 52324-52331.

2 J. S. Zakhari, I. Kinoyama, M. S. Hixon, A. D. Mola, D. Globisch and K. D. Janda, *Bioorg. Med. Chem.*, 2011, **19**, 6203-6209.
